# Supplementary material for: Reciprocal Change of Cervical Spine after Posterior Spinal Fusion for Lenke Type 1 and 2 Adolescent Idiopathic Scoliosis
Source: MDPI journal article supplement (doi:10.3390/jcm12175599), 2023-08-28
Supplement: s1 [file s1]

| SRS-22r domain | Preoperative | Postoperative | <i>p</i> -value |
|----------------|--------------|---------------|-----------------|
| Function       | 4.58 ± 0.45  | 4.73 ± 0.24   | 0.098           |
| Pain           | 4.27 ± 0.66  | 4.54 ± 0.47   | 0.021           |
| Self-image     | 2.79 ± 0.53  | 3.96 ± 0.66   | <0.001          |
| Mental health  | 4.13 ± 0.67  | 4.35 ± 0.62   | 0.046           |
| Subtotal       | 4.05 ± 0.44  | 4.40 ± 0.33   | < 0.001         |
| Satisfaction   | /            | 3.97 ± 0.76   | /               |
| Total          | /            | 4.35 ± 0.34   | /               |

Table S1. Comparison of SRS-22r before and after surgery in participants in aged 18 years or younger.

| SRS-22r domain | hyperkyphosis | non-hyperkyphosis | <i>p</i> -value |
|----------------|---------------|-------------------|-----------------|
| Function       | 4.47 ± 0.47   | 4.62 ± 0.45       | 0.38            |
| Pain           | 3.84 ± 0.75   | 4.41 ± 0.58       | 0.025           |
| Self-image     | 2.51 ± 0.59   | 2.88 ± 0.49       | 0.070           |
| Mental health  | 3.62 ± 0.79   | 4.30 ± 0.53       | 0.006           |
| Subtotal       | 3.69 ± 0.42   | 4.17 ± 0.38       | 0.003           |
| Satisfaction   | /             | /                 | /               |
| Total          | /             | /                 | /               |

Table S2. Comparison of preoperative SRS-22r between hyperkyphosis and non-hyperkyphosis groups in aged 18 years or younger.

hyperkyphosis group: patients whose cervical lordosis at the 2-year follow-up  $\leq$  -10°, non-hyperkyphosis group: patients whose cervical lordosis at the 2-year follow-up  $>$  -10°. Data are expressed as the mean  $\pm$  standard deviation.

| SRS-22r domain | hyperkyphosis | non-hyperkyphosis | <i>p</i> -value |
|----------------|---------------|-------------------|-----------------|
| Function       | 4.73 ± 0.20   | 4.73 ± 0.26       | 0.94            |
| Pain           | 4.22 ± 0.42   | 4.64 ± 0.45       | 0.018           |
| Self-image     | 3.69 ± 0.58   | 4.05 ± 0.67       | 0.16            |
| Mental health  | 3.84 ± 0.80   | 4.52 ± 0.45       | 0.003           |
| Subtotal       | 4.12 ± 0.36   | 4.49 ± 0.27       | 0.003           |
| Satisfaction   | 3.72 ± 0.87   | 4.06 ± 0.71       | 0.26            |
| Total          | 4.09 ± 0.36   | 4.44 ± 0.30       | 0.006           |

Table S3. Comparison of SRS-22r at 2 years after surgery between hyperkyphosis and non-hyperkyphosis groups in aged 18 years or younger.

hyperkyphosis group: patients whose cervical lordosis at the 2-year follow-up  $\leq$   $-10^\circ$ , non-hyperkyphosis group: patients whose cervical lordosis at the 2-year follow-up  $> -10^\circ$ . Data are expressed as the mean  $\pm$  standard deviation.

| Variables    | Preoperative | Postoperative | $\Delta$ | <i>p</i> -value |
|--------------|--------------|---------------|----------|-----------------|
| CL (°)       | -11 ± 10     | -4 ± 10       | 7 ± 2    | < 0.001         |
| TK (°)       | 22 ± 12      | 31 ± 7        | 9 ± 2    | < 0.001         |
| LL (°)       | 54 ± 11      | 54 ± 11       | 1 ± 1    | 0.53            |
| MT Cobb (°)  | 54 ± 10      | 21 ± 6        | -33 ± 1  | < 0.001         |
| T1-slope (°) | 17 ± 6       | 20 ± 7        | 4 ± 1    | < 0.001         |

Table S4. The pre-, postoperative, and changes in spinal alignments in aged 18 years or younger.

CL: cervical lordosis, TK: thoracic kyphosis, LL: lumbar lordosis, MT: major thoracic. Data except for  $\Delta$  are expressed as the mean ± standard deviation. Data of  $\Delta$  is expressed as mean ± standard error.

| Candidate           | Univariate analysis |                 | Multivariate analysis |                 |
|---------------------|---------------------|-----------------|-----------------------|-----------------|
|                     | OR (95%CI)          | <i>p</i> -value | OR (95%CI)            | <i>p</i> -value |
| Pre CL (-10°)       | 3.5 (1.1-11)        | 0.032           | 25 (1.1- 545)         | 0.041           |
| Pre TK (-10°)       | 1.4 (0.73-2.8)      | 0.29            |                       |                 |
| Pre LL (-10°)       | 0.81 (0.40-1.6)     | 0.55            |                       |                 |
| Pre T1 slope (-10°) | 0.98 (0.26-3.7)     | 0.97            |                       |                 |
| ΔCL (-10°)          | 2.1 (0.87-5.1)      | 0.10            |                       |                 |
| ΔTK (-10°)          | 1.5 (0.66-3.3)      | 0.34            | 6.8 (0.8-56)          | 0.079           |
| ΔLL (-10°)          | 0.81 (0.40-1.6)     | 0.55            |                       |                 |
| ΔT1-slope (-10°)    | 7.8 (1.3-47)        | 0.025           | 112 (2.5-5059)        | 0.015           |
| Age (+1 year)       | 1.3 (0.80- 2.1)     | 0.28            | 1.5 (0.55-4.1)        | 0.42            |

Table S5. Univariate and multivariate analyzes of association between hyperkyphosis at 2 years postoperative and age and other candidate factors in aged 18 years or younger.

OR: Odds ratio, CI: confidence interval, Pre: preoperative,

The lordosis alignment is shown as a positive value for the cervical and lumbar spine and a negative value for the thoracic spine.
